# Supplementary material
Source: PubMed Central journal article supplement (PMC5094457)
Supplement: NIHMS823809-supplement-Supplemental_Table_1.pdf [file NIHMS823809-supplement-Supplemental_Table_1.pdf]

|         |               | Sample        |               | Statistics  |            |             |             |
|---------|---------------|---------------|---------------|-------------|------------|-------------|-------------|
| Fig. 2  | Brain area    | Odor          | Sample size   | Comparison  | p-value    | Effect size |             |
| Fig. 2b | pPir          | H2O           | 6             |             |            |             |             |
|         |               | Rabbit urine  | 5             | vs H2O      | > 0.999    | 0.40        |             |
|         |               | Bobcat urine  | 6             | vs H2O      | 0.147      | 0.92        |             |
|         |               | TMT           | 6             | vs H2O      | 0.371      | 0.72        |             |
|         | LEnt          | H2O           | 6             |             |            |             |             |
|         |               | Rabbit urine  | 5             | vs H2O      | 0.898      | -0.63       |             |
|         |               | Bobcat urine  | 6             | vs H2O      | > 0.999    | -0.01       |             |
|         |               | TMT           | 6             | vs H2O      | > 0.999    | 0.10        |             |
|         | ACo           | H2O           | 6             |             |            |             |             |
|         |               | Rabbit urine  | 5             | vs H2O      | > 0.999    | 0.22        |             |
|         |               | Bobcat urine  | 6             | vs H2O      | 0.937      | -0.47       |             |
|         |               | TMT           | 6             | vs H2O      | > 0.999    | -0.10       |             |
| PLCo    | H2O           | 6             |               |             |            |             |             |
|         | Rabbit urine  | 5             | vs H2O        | 0.743       | 0.93       |             |             |
|         | Bobcat urine  | 6             | vs H2O        | 0.971       | 0.74       |             |             |
|         | TMT           | 6             | vs H2O        | > 0.999     | 0.68       |             |             |
| AmPir   | H2O           | 6             |               |             |            |             |             |
|         | Rabbit urine  | 5             | vs H2O        | > 0.999     | 0.24       |             |             |
|         | Bobcat urine  | 6             | vs H2O        | 0.011       | 3.43       |             |             |
|         | TMT           | 6             | vs H2O        | 0.005       | 2.63       |             |             |
| MEAA    | H2O           | 6             |               |             |            |             |             |
|         | Rabbit urine  | 5             | vs H2O        | > 0.999     | 0.31       |             |             |
|         | Bobcat urine  | 6             | vs H2O        | > 0.999     | 0.71       |             |             |
|         | TMT           | 6             | vs H2O        | 0.849       | 0.74       |             |             |
| MEAp    | H2O           | 6             |               |             |            |             |             |
|         | Rabbit urine  | 5             | vs H2O        | 0.885       | -0.50      |             |             |
|         | Bobcat urine  | 6             | vs H2O        | > 0.999     | -0.41      |             |             |
|         | TMT           | 6             | vs H2O        | > 0.999     | -0.06      |             |             |
| PMCo    | H2O           | 6             |               |             |            |             |             |
|         | Rabbit urine  | 5             | vs H2O        | > 0.999     | -0.33      |             |             |
|         | Bobcat urine  | 6             | vs H2O        | > 0.999     | -0.38      |             |             |
|         | TMT           | 6             | vs H2O        | > 0.999     | -0.27      |             |             |
| Fig. 3  | AAV injection | CNO or Saline | Sample size   | Comparison  | p-value    | Effect size |             |
|         | pPir          | Saline        | 5             | vs Saline   | 0.247      | -0.90       |             |
| Fig. 3e | AmPir         | Saline        | 6             | vs Saline   | 0.026      | 1.68        |             |
|         | MEA           | Saline        | 6             | vs Saline   | 0.026      | 1.54        |             |
| Fig. 3g | pPir          | Saline        | 4             | vs Saline   | 0.046      | 2.28        |             |
|         | AmPir         | Saline        | 4             | vs Saline   | 0.020      | 3.06        |             |
| Fig. 3i | MEA           | Saline        | 4             | vs Saline   | 0.028      | 2.82        |             |
|         | AmPir         | Saline        | 6             | vs Saline   | 0.041      | 1.38        |             |
| Fig. 4  | AAV injection | Odor          | CNO or Saline | Sample size | Comparison | p-value     | Effect size |
|         | AmPir         | Bobcat urine  | Saline        | 6           | vs Saline  | 0.026       | -2.08       |
| Fig. 4d | AmPir         | TMT           | Saline        | 6           | vs Saline  | 0.014       | -1.49       |
|         | PLCo          | Bobcat urine  | Saline        | 7           | vs Saline  | 0.836       | -0.13       |
| Fig. 4e | AmPir         | Bobcat urine  | Saline        | 5           | vs Saline  | < 0.001     | -4.87       |
|         | AmPir         | TMT           | Saline        | 6           | vs Saline  | 0.036       | -1.60       |
| Fig. 4f | PLCo          | Bobcat urine  | Saline        | 7           | vs Saline  | 0.702       | -0.21       |
|         | PMCo          | Bobcat urine  | Saline        | 6           | vs Saline  | 0.044       | -1.33       |
| Fig. 4g | AmPir         | TMT           | Saline        | 6           | vs Saline  | 0.035       | -1.34       |
|         | PLCo          | Bobcat urine  | Saline        | 7           | vs Saline  | 0.766       | -0.18       |
| Fig. 4g | AmPir         | Bobcat urine  | Saline        | 6           | vs Saline  | 0.533       | -0.91       |
|         | AmPir         | TMT           | Saline        | 6           | vs Saline  | 0.629       | -0.74       |

  

|                   |              | Sample        |             | Statistics  |             |             |
|-------------------|--------------|---------------|-------------|-------------|-------------|-------------|
| Ext. Data Fig. 4  | Brain area   | Subdivision   | Sample size | Comparison  | p-value     | Effect size |
| Ext. Data Fig. 4f | pPir         | Anterior      | 4           |             |             |             |
|                   |              | Posterior     | 4           | vs Anterior | < 0.001     | 22.63       |
| Ext. Data Fig. 4g | AmPir        | Anterior      | 4           |             |             |             |
|                   |              | Posterior     | 4           | vs Anterior | 0.002       | 10.54       |
| Ext. Data Fig. 4h | MEA          | AD            | 4           | AD vs AV    | 0.690       | -1.13       |
|                   |              | AV            | 4           | AD vs PD    | 0.316       | 1.52        |
|                   |              | PD            | 4           | AD vs PV    | 0.002       | 3.68        |
|                   |              | PV            | 4           | AV vs PD    | 0.064       | 3.07        |
|                   |              |               |             |             | AV vs PV    | 0.001       |
|                   |              |               | PD vs PV    | 0.030       | 2.44        |             |
| Ext. Data Fig. 6  | Odor         | Sample size   | Comparison  | p-value     | Effect size |             |
| Ext. Data Fig. 6b | H2O          | 6             |             |             |             |             |
|                   | Rabbit urine | 6             | vs H2O      | 0.417       | -0.64       |             |
|                   | Bobcat urine | 6             | vs H2O      | < 0.001     | 6.44        |             |
| Ext. Data Fig. 6c | H2O          | 6             |             |             |             |             |
|                   | Rabbit urine | 6             | vs H2O      | 1.000       | -0.11       |             |
|                   | Bobcat urine | 6             | vs H2O      | 0.035       | 2.07        |             |
| Ext. Data Fig. 6d | H2O          | 6             |             |             |             |             |
|                   | Rabbit urine | 6             | vs H2O      | > 0.999     | 0.68        |             |
|                   | Bobcat urine | 6             | vs H2O      | 0.008       | 3.37        |             |
| Ext. Data Fig. 9  | Brain area   | CNO or Saline | Sample size | Comparison  | p-value     | Effect size |
|                   | AmPir        | Saline        | 6           | vs Saline   | < 0.001     | -6.22       |
|                   |              | CNO           | 6           | vs Saline   | 0.033       | -1.43       |
| Ext. Data Fig. 9b | PLCo         | Saline        | 6           | vs Saline   | 0.355       | -0.56       |
|                   | PMCo         | Saline        | 6           | vs Saline   | 0.002       | -3.21       |
|                   | PLCo         | CNO           | 6           | vs Saline   | 0.340       | -0.58       |
| Ext. Data Fig. 9c | PMCo         | Saline        | 6           | vs Saline   | 0.234       | -0.73       |
|                   | AmPir        | Saline        | 7           | vs Saline   | 0.314       | -0.58       |
|                   | PLCo         | Saline        | 7           | vs Saline   | 0.012       | -1.71       |
| Ext. Data Fig. 9d | PLCo         | CNO           | 6           | vs Saline   | 0.080       | -1.30       |
|                   | PMCo         | Saline        | 7           | vs Saline   |             |             |

**Supplementary Table 1 | Statistical Analyses.** Shown for each Figure with statistical analyses are the number of animals (sample size), p-values, and effect sizes for individual experiments. Standard deviation units are used for the effect sizes.
